# Supplementary material for: Multidecadal behavior of the North Atlantic Oscillation during the last millennium
Source: Copernicus journal article supplement (doi:10.5194/egusphere-2025-4121), 2025-08-29
Supplement: Supplementary file 1 [file egusphere-2025-4121-supplement.pdf]

# Multidecadal behavior of the North Atlantic Oscillation during the last millennium

Andrew A. Flaim<sup>1</sup>, Bronwen L. Konecky<sup>1</sup>, Sloan Coats<sup>2</sup>

<sup>1</sup>Department of Earth, Environmental, and Planetary Sciences, Washington University in St. Louis, St. Louis, MO, USA

<sup>2</sup>Department of Earth Sciences, University of Hawai'i at Mānoa, Honolulu, HI, USA

Correspondence to: Andrew A. Flaim (aflaim@wustl.edu)

## Supplementary material

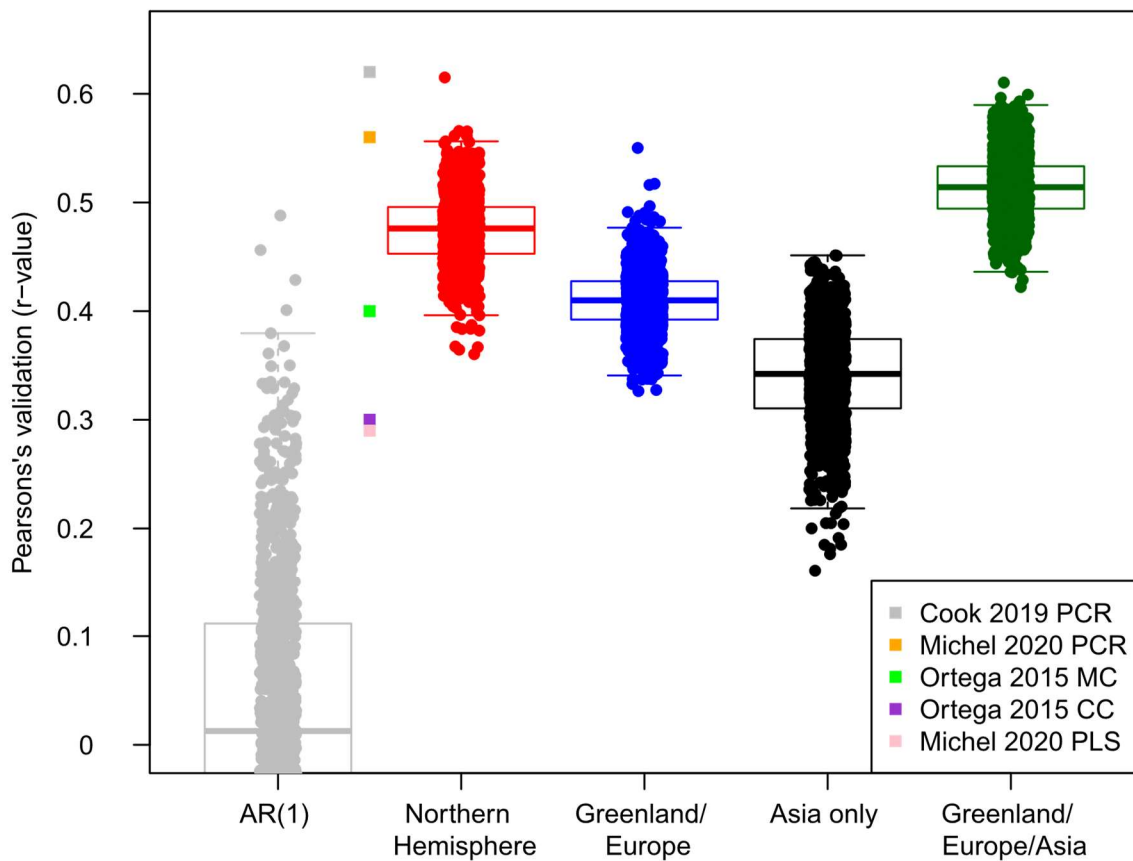

**Figure S1.** As in Fig. 3 but after padding the regional subsets with AR(1) noise to match the number of records in the full reconstruction.

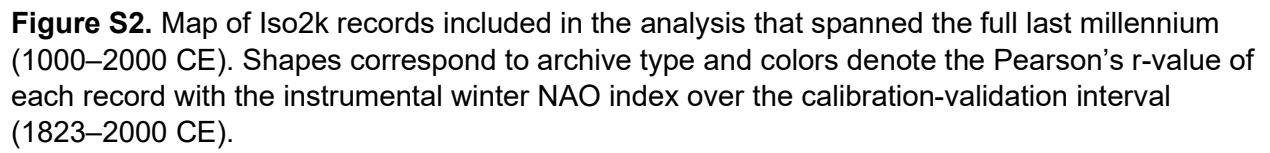

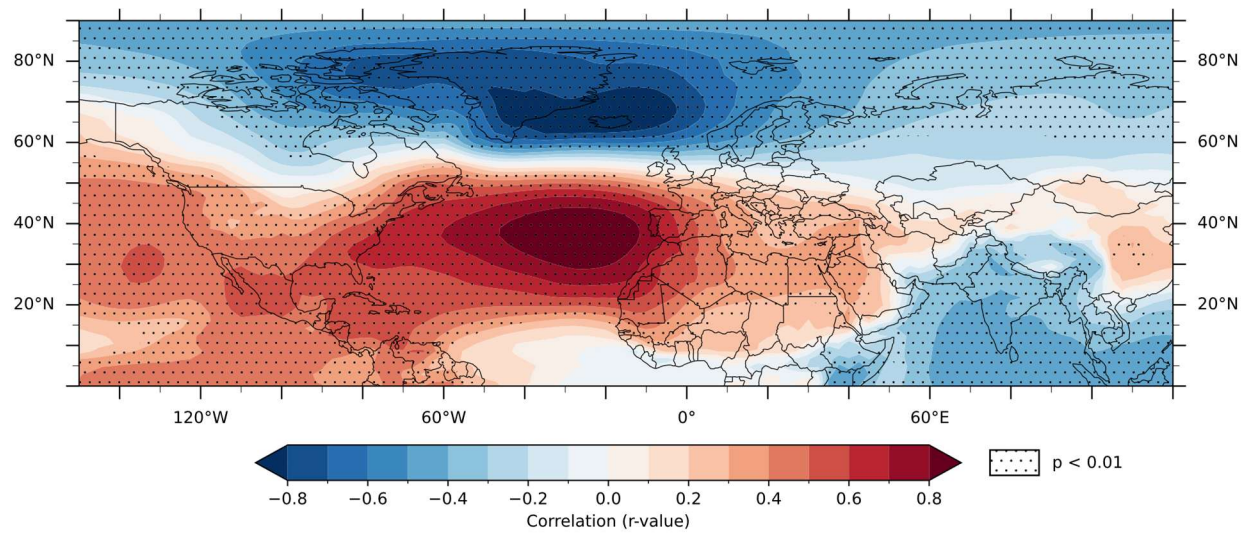

**Figure S3.** Winter NAO<sub>ILME</sub> correlations (color contours) with winter sea level pressure over the period 1823–2000 CE. Stippling denotes  $p < 0.01$ .

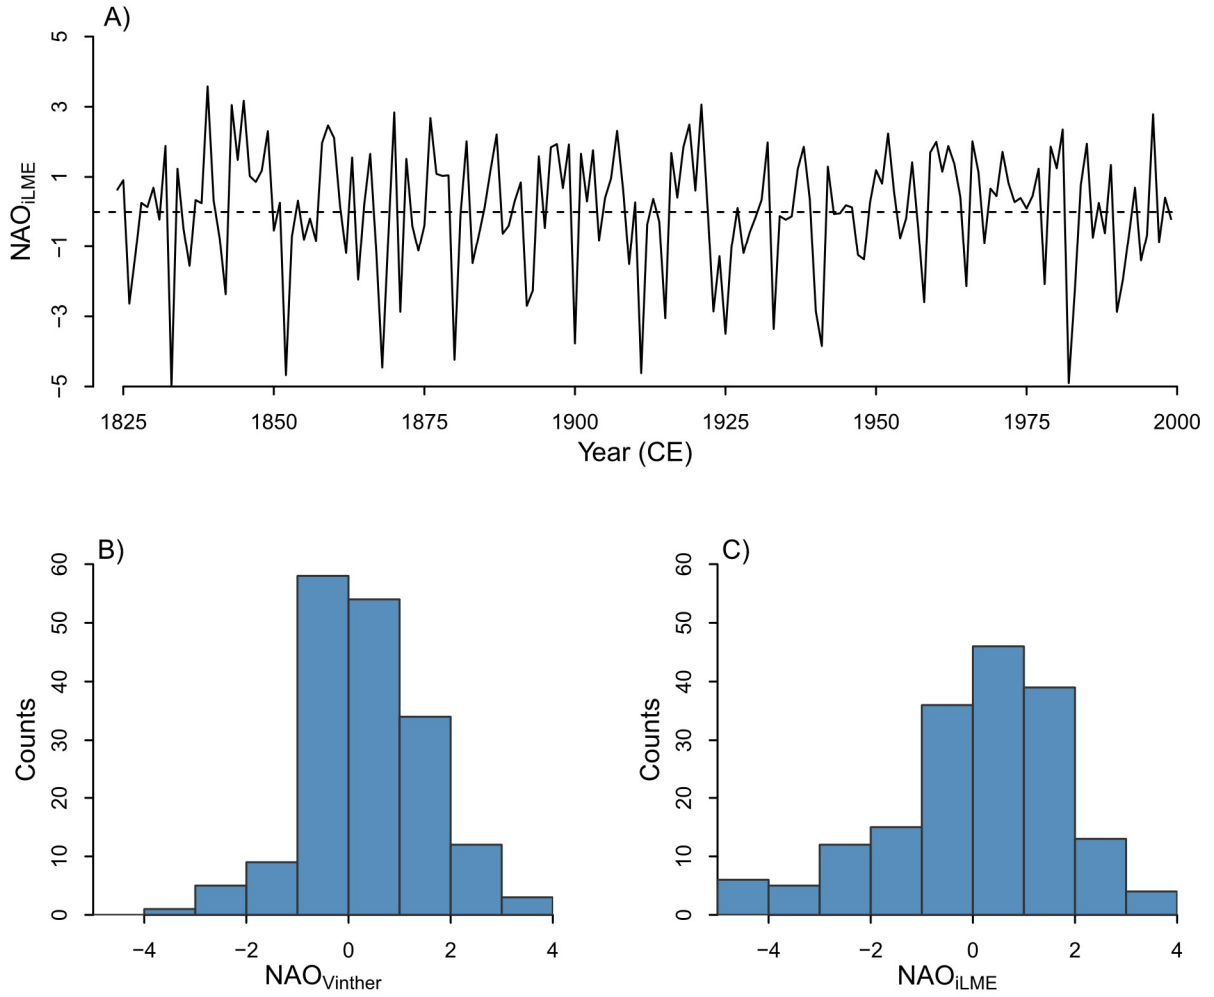

**Figure S4.** (a) Timeseries of the winter (DJF)  $NAO_{iLME}$  index generated from the first fully forced ensemble member of the iLME CESM for the period 1823–2000 CE. (b) Histogram of NAO index values from  $NAO_{vinther}$ . (c) Histogram of NAO index values from  $NAO_{iLME}$  shown in panel (a).

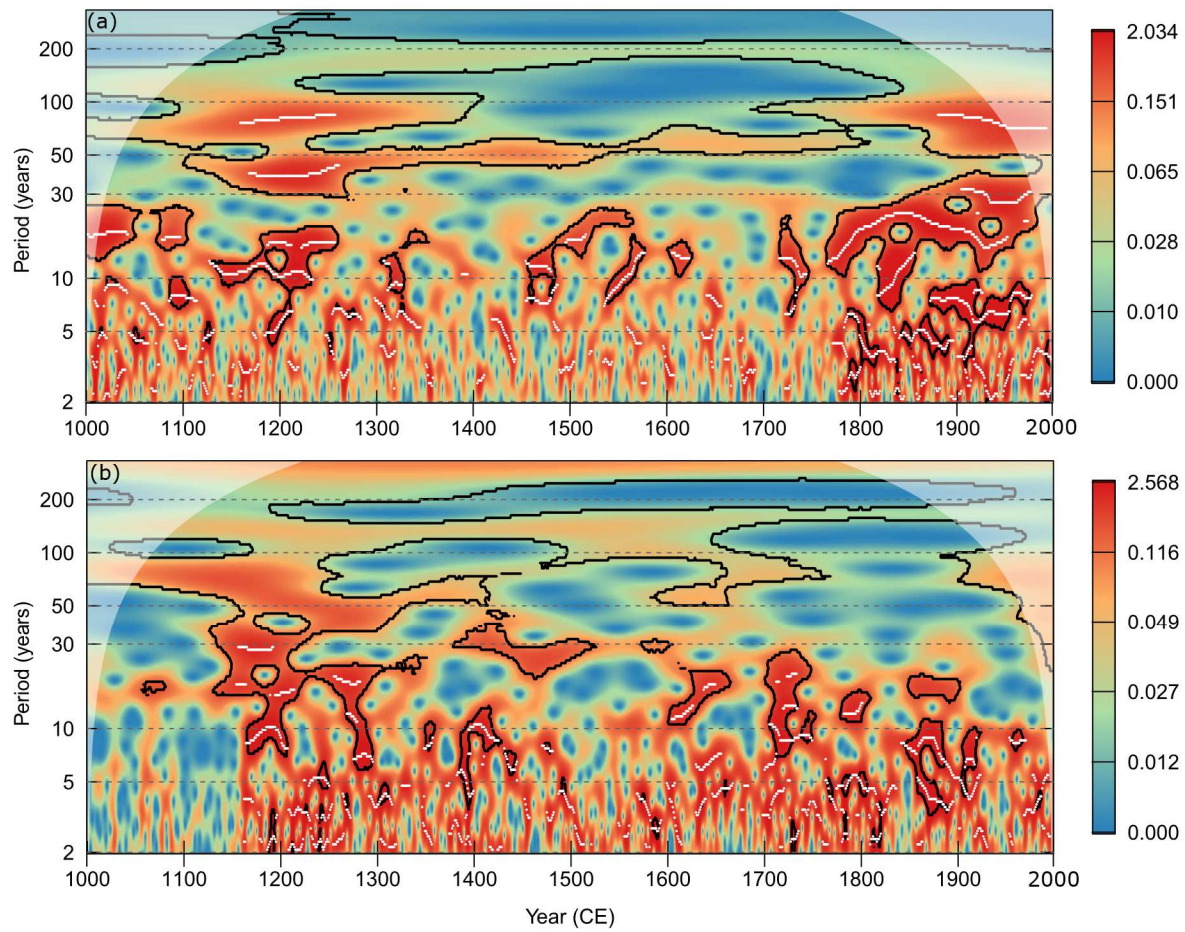

**Figure S5.** Wavelet decomposition of the NAO reconstructions from 1000–2000 CE using only (a) glacier ice and (b) wood cellulose records. Color contours are scaled by power quantiles. Black contours bound statistically significant power ( $p < 0.05$ ) and white curves show ridges (power maxima). White envelope shows the region of influence where padding may influence the spectrum.

| NDJFM monthly Lhasa winter correlation r-values |     |              |               |      |
|-------------------------------------------------|-----|--------------|---------------|------|
|                                                 | NAO | Temperature  | Precipitation | d18O |
| NAO                                             |     | <b>-0.55</b> | <b>0.46</b>   | 0.17 |
| Temperature                                     |     |              | 0.04          | 0.35 |
| Precipitation                                   |     |              |               | 0.19 |

**Table S1.** Winter (NDJFM) monthly correlations between NAO<sub>Vinther</sub> and observed temperature, precipitation amount, and  $\delta^{18}\text{O}_{\text{precip}}$  for the period 1994–2006 (not continuous). Bold values indicate significant correlations at  $p < 0.1$ .

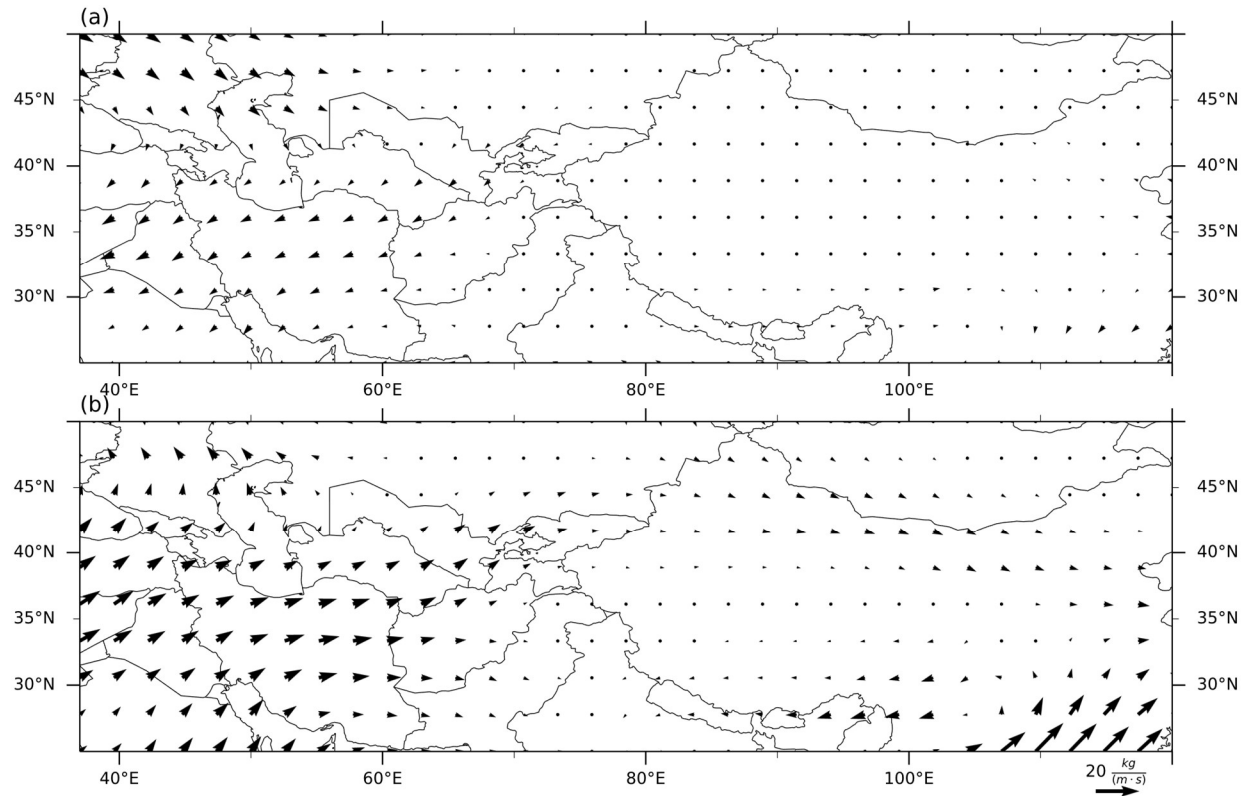

**Figure S6.** Winter (DJF) IVT anomalies during positive (a) and negative (b) winter  $\text{NAO}_{\text{ILME}}$  years, with these defined as greater or less than one standard deviation from the mean, respectively, over the period 1823–2000 CE. Anomalies were calculated relative to the full period from 1823–2000 CE.
